# Supplementary material
Source: PubMed Central journal article supplement (PMC4538626)
Supplement: pnas.1509448112.sapp.pdf [file pnas.1509448112.sapp.pdf]

1 **Supplemental Information**

2 Figure S1: Abundance of Fe related proteins in oceanic *Synechococcus sp.* strain WH8102 in

3 response to [Fe<sup>2+</sup>].

4

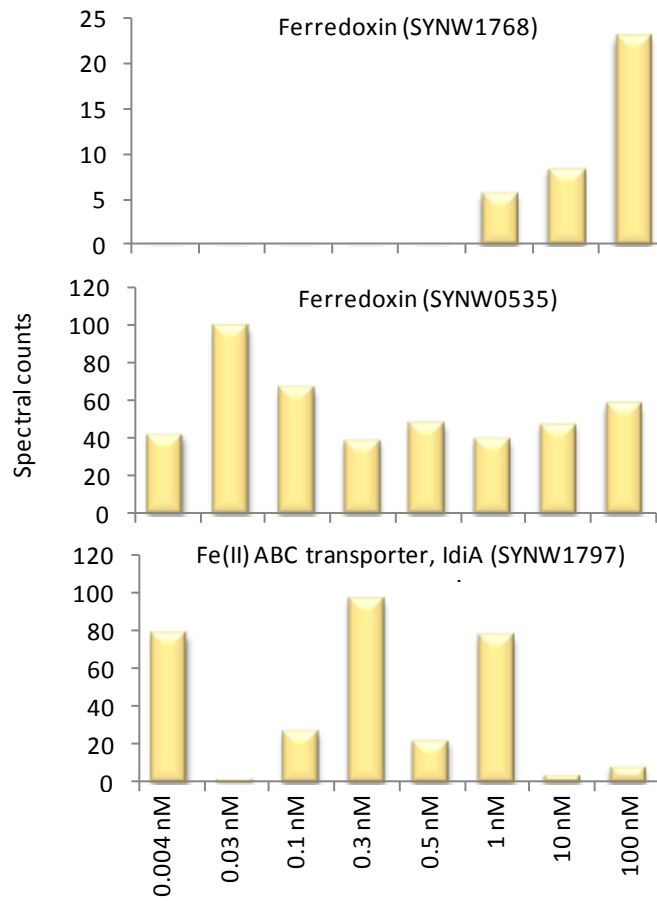

5

6

7 Figure S2: Comparison of flow cytometry and fluorescence measurements on the final day of  
8 each experiment.

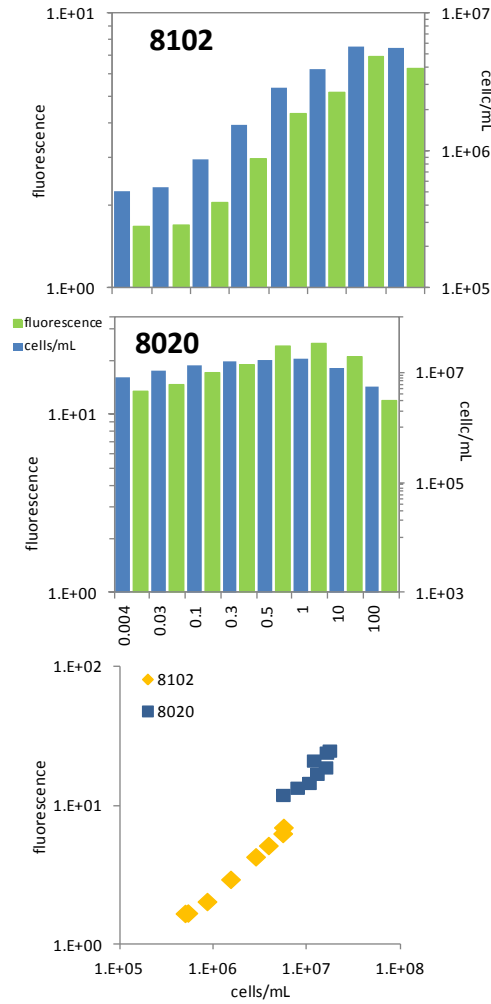

9

10 :

Table S1: Fe related proteins in the *Synechococcus* WH8020, WH8102, and CC9311 genomes. Proteins listed in each row represent the closest matching amino acid sequences among the three strains. Black, green, and blue text indicates that the protein in a given row is present in three, two, or one of the strain genomes respectively. This information is shown graphically in the Venn diagram in figure 3B.

| WH8102   |                                                                 | WH8020     |                                                                                             | CC9311    |                                             |
|----------|-----------------------------------------------------------------|------------|---------------------------------------------------------------------------------------------|-----------|---------------------------------------------|
| ID       | Protein                                                         | ID         | Protein                                                                                     | ID        | Protein                                     |
| SYNW1841 | Cytochrome b6/f complex subunit<br>(Rieske iron-sulfur protein) | WB44_07765 | Cytochrome b6-f complex iron-sulfur subunit PetC1 (Rieske iron sulfur protein EC 1.10.99.1) | sync_2149 | cytochrome b6-f complex iron-sulfur subunit |
| SYNW1632 | hypothetical                                                    | WB44_00870 | Possible 4Fe-4S iron sulfur cluster binding protein                                         | sync_0748 | 4Fe-4S iron sulfur cluster binding protein  |
| SYNW1705 | hypothetical                                                    | WB44_01950 | Ferredoxin                                                                                  | sync_0892 | ferredoxin                                  |
| SYNW1277 | ferredoxin                                                      |            | Ferredoxin                                                                                  | sync_1397 | iron-sulfur cluster-binding protein         |
| SYNW1768 | ferredoxin                                                      | WB44_07000 | Ferredoxin                                                                                  | sync_2017 | iron-sulfur cluster-binding protein         |
| SYNW0624 | possible 3Fe-4S ferredoxin                                      | WB44_08620 | Ferredoxin                                                                                  | sync_2348 | ferredoxin (3Fe-4S)                         |
| SYNW1981 | ferredoxin                                                      | WB44_13840 | Ferredoxin                                                                                  | sync_0535 | ferredoxin (2Fe-2S)                         |
| SYNW0697 | putative ferredoxin like protein                                | WB44_02125 | Ferredoxin, 2Fe-2S                                                                          | sync_0919 | ferredoxin                                  |
| SYNW1343 | ferredoxin                                                      | WB44_02385 | soluble [2Fe-2S] ferredoxin                                                                 | sync_0980 | ferredoxin                                  |
| SYNW1274 | Ferredoxin                                                      | WB44_04140 | soluble [2Fe-2S] ferredoxin                                                                 | sync_1394 | ferredoxin (2Fe-2S)                         |
|          |                                                                 | WB44_06700 | soluble [2Fe-2S] ferredoxin                                                                 | sync_1953 | ferredoxin                                  |

|          |                                                                   |            |                                                                   |           |                                                                  |
|----------|-------------------------------------------------------------------|------------|-------------------------------------------------------------------|-----------|------------------------------------------------------------------|
| SYNW0535 | Ferredoxin                                                        | WB44_08230 | soluble [2Fe-2S] ferredoxin                                       | sync_2254 | ferredoxin                                                       |
| SYNW0497 | Ferredoxin                                                        | WB44_08440 | soluble [2Fe-2S] ferredoxin                                       | sync_2310 | ferredoxin, 2Fe-2S                                               |
|          |                                                                   | WB44_10810 | soluble [2Fe-2S] ferredoxin                                       | sync_2841 | ferredoxin                                                       |
| SYNW0521 | putative ferredoxin-thioredoxin reductase, variable chain         | WB44_08310 | Ferredoxin-thioredoxin reductase, variable chain                  | sync_2274 | ferredoxin-thioredoxin reductase variable chain                  |
| SYNW0318 | Ferredoxin thioredoxin reductase, catalytic beta chain            | WB44_09225 | Ferredoxin                                                        | sync_2484 | ferredoxin thioredoxin reductase, catalytic beta chain           |
| SYNW0751 | ferredoxin--NADP reductase                                        | WB44_02485 | Ferredoxin-NADP(+) reductase (EC 1.18.1.2)                        | sync_1003 | ferredoxin--NADP reductase                                       |
| SYNW2132 | Ferredoxin-dependent glutamate synthase                           | WB44_13115 | Ferredoxin-dependent glutamate synthase (EC 1.4.7.1)              | sync_0387 | ferredoxin-dependent glutamate synthase                          |
| SYNW2477 | Ferredoxin--nitrite reductase                                     | WB44_11090 | Ferredoxin--nitrite reductase (EC 1.7.7.1)                        | sync_2898 | ferredoxin-nitrite reductase                                     |
| SYNW1095 | Ferredoxin-sulfite reductase                                      | WB44_03570 | Ferredoxin--sulfite reductase (EC 1.8.7.1)                        | sync_1280 | sulfite reductase subunit beta                                   |
|          |                                                                   | WB44_11855 | Ferredoxin reductase                                              |           |                                                                  |
| SYNW1797 | putative iron ABC transporter, substrate binding protein          | WB44_04835 | Ferric iron ABC transporter, iron-binding protein                 | sync_1545 | ABC-type Fe <sup>3+</sup> transport system periplasmic component |
| SYNW1798 | putative iron ABC transporter                                     | WB44_07150 | Ferric iron ABC transporter, permease protein                     | sync_2048 | ABC-type Fe <sup>3+</sup> transport system permease component    |
| SYNW1544 | ABC transporter, ATP binding component, possibly iron transporter | WB44_06655 | ABC transporter, ATP binding component, possibly iron transporter | sync_1942 | ABC transporter ATP-binding protein                              |

|          |                                                              |                            |                                                                                                                            |                           |                                                                  |
|----------|--------------------------------------------------------------|----------------------------|----------------------------------------------------------------------------------------------------------------------------|---------------------------|------------------------------------------------------------------|
|          |                                                              |                            |                                                                                                                            | <a href="#">sync_0682</a> | <a href="#">ferrous iron transport protein A</a>                 |
|          |                                                              |                            |                                                                                                                            | <a href="#">sync_0681</a> | <a href="#">ferrous iron transport protein B</a>                 |
|          |                                                              |                            |                                                                                                                            | <a href="#">sync_2395</a> | <a href="#">iron ABC transporter ATP-binding protein</a>         |
| SYNW1340 | ABC transporter, ATP binding domain, possibly Mn transporter | WB44_05820                 | ABC transporter, ATP binding domain, possibly Mn transporter                                                               | <a href="#">sync_1757</a> | <a href="#">iron chelate ABC transporter ATP-binding protein</a> |
| SYNW2366 | conserved hypothetical putative integral membrane protein    | WB44_10525                 | Mn <sup>2+</sup> and Fe <sup>2+</sup> transporter, NRAMP family                                                            | <a href="#">sync_2773</a> | <a href="#">Mn<sup>2+</sup>/Fe<sup>2+</sup> transporter</a>      |
|          |                                                              | <a href="#">WB44_04810</a> | <a href="#">Ferritin</a>                                                                                                   | <a href="#">sync_1539</a> | <a href="#">Ferritin</a>                                         |
|          |                                                              |                            |                                                                                                                            | <a href="#">sync_0687</a> | <a href="#">Ferritin</a>                                         |
|          |                                                              |                            |                                                                                                                            | <a href="#">sync_0854</a> | <a href="#">Ferritin</a>                                         |
|          |                                                              |                            |                                                                                                                            | <a href="#">sync_1077</a> | <a href="#">Ferritin</a>                                         |
|          |                                                              |                            |                                                                                                                            | <a href="#">sync_0680</a> | <a href="#">Ferritin</a>                                         |
| SYNW1747 | ferrochelatase                                               | WB44_06915                 | Ferrochelatase, protoheme ferro-lyase (EC 4.99.1.1)                                                                        | <a href="#">sync_2000</a> | <a href="#">ferrochelatase</a>                                   |
| SYNW0865 | Ferric uptake regulator family                               | WB44_03040                 | Ferric uptake regulation protein FUR                                                                                       | <a href="#">sync_1167</a> | <a href="#">transcriptional regulator, Fur family protein</a>    |
| SYNW0774 | Ferric uptake regulation protein                             | WB44_05660                 | Peroxide stress regulator; Ferric uptake regulation protein; Fe <sup>2+</sup> /Zn <sup>2+</sup> uptake regulation proteins | <a href="#">sync_1722</a> | <a href="#">transcriptional regulator, Fur family protein</a>    |
| SYNW2401 | Ferric uptake regulator family                               | WB44_10775                 | Ferric uptake regulation protein                                                                                           | <a href="#">sync_2831</a> | <a href="#">transcriptional regulator, Fur family protein</a>    |

|          |                                              |            |                                                                       |           |                                                                    |
|----------|----------------------------------------------|------------|-----------------------------------------------------------------------|-----------|--------------------------------------------------------------------|
|          |                                              | WB44_06685 | Flavodoxin 1                                                          | sync_1950 | flavodoxin FldA                                                    |
| SYNW2368 | putative flavoprotein                        | WB44_10555 | Diflavin flavoprotein SYNW2368                                        | sync_2780 | flavodoxin:flavin reductase-<br>likedomain-containing protein      |
| SYNW0163 | putative glycolate oxidase subunit<br>(Fe-S) | WB44_12240 | Glycolate dehydrogenase (EC<br>1.1.99.14), iron-sulfur subunit GlcF   | sync_0213 | Fe-S oxidoreductase                                                |
|          |                                              |            |                                                                       | sync_2669 | Iron-containing alcohol<br>dehydrogenase                           |
|          |                                              | WB44_04570 | Iron-regulated protein A precursor                                    | sync_1502 | Iron-regulated protein A precursor,<br>putative                    |
| SYNW0321 | ABC transporter, membrane<br>component       | WB44_09210 | Iron-sulfur cluster assembly protein<br>SufD                          | sync_2481 | FeS assembly protein SufD                                          |
| SYNW0320 | ABC transporter, ATP-binding<br>component    | WB44_09215 | Iron-sulfur cluster assembly ATPase<br>protein SufC                   | sync_2482 | FeS assembly ATPase SufC                                           |
| SYNW0319 | ABC transporter, membrane<br>component       | WB44_09220 | Iron-sulfur cluster assembly protein<br>SufB                          | sync_2483 | cysteine desulfurase activator<br>complex subunit SufB             |
| SYNW0317 | ArsR family transcriptional regulator        | WB44_09230 | Iron-sulfur cluster regulator SufR                                    | sync_2485 | iron-sulfur cluster biosynthesis<br>transcriptional regulator SufR |
| SYNW0712 | possible sufE protein                        | WB44_02220 | Sulfur acceptor protein SufE for<br>iron-sulfur cluster assembly      | sync_0942 | Fe-S metabolism protein, SufE<br>family protein                    |
| SYNW0007 | hypothetical protein                         | WB44_11325 | FIG01150787: hypothetical protein                                     | sync_0007 | iron-sulfur cluster binding protein,<br>putative                   |
| SYNW2479 | ABC transporter component,<br>possibly Zn    | WB44_04545 | manganese/zinc/iron chelate ABC<br>transporter (MZT) family, permease | sync_1497 | manganese/zinc/iron chelate ABC<br>transporter permease            |

|          |                                                                |            |                                                                                                           |           |                                                                 |
|----------|----------------------------------------------------------------|------------|-----------------------------------------------------------------------------------------------------------|-----------|-----------------------------------------------------------------|
|          |                                                                |            | protein                                                                                                   |           |                                                                 |
| SYNW2480 | ABC transporter,ATP binding component, possibly zinc transport | WB44_04550 | ABC transporter,ATP binding component, possibly zinc transport                                            | sync_1498 | manganese/zinc/iron chelate ABC transporter ATP-binding protein |
| SYNW2214 | hypothetical protein                                           | WB44_09615 | probable iron binding protein from the HesB_IscA_SufA family                                              | sync_2569 | iron-sulfur cluster assembly accessory protein                  |
| SYNW1990 | hypothetical protein                                           | WB44_13800 | Putative heme iron utilization protein                                                                    | sync_0526 | hypothetical protein                                            |
|          |                                                                | WB44_10870 | Non-specific DNA-binding protein<br>Dps / Iron-binding ferritin-like<br>antioxidant protein / Ferroxidase | sync_2856 | hypothetical protein                                            |

Table S2: Stoichiometric calculations of iron responsive proteins in WH8020. The quantitation is based on the average of all measurements for each peptide standard. "Low Fe" values are averages of all measurements  $\leq 1$ nM Fe', while "high Fe" values are averages of all measurements  $> 1$ nM Fe'. The molecular weight and number of N atoms per protein are based on amino acid sequences for each protein.

| Protein         | Peptide standard target sequences                     | Protein molecular weight (fg / fmol) | N atoms per protein (fmol N / fmol) | Target protein abundance "Low Fe" (fmol / $\mu$ g total protein) | Target protein abundance "High Fe" (fmol / $\mu$ g total protein) | Difference in fmol between "high" and "low" treatments (fmol / $\mu$ g total protein) | Difference in fg between "high" and "low" treatments (fg / $\mu$ g total protein) | Difference in percent between "high" and "low" treatments* (%) | N content "Low Fe" (pmol N/ug total protein) | N content "High Fe" (pmol N/ug total protein) |
|-----------------|-------------------------------------------------------|--------------------------------------|-------------------------------------|------------------------------------------------------------------|-------------------------------------------------------------------|---------------------------------------------------------------------------------------|-----------------------------------------------------------------------------------|----------------------------------------------------------------|----------------------------------------------|-----------------------------------------------|
| IdiA (1196)     | ADVIIIVLDAAR,<br>LVEASGISLVQR,<br>GLTSNVSQPYFGGDIGLIR | 35907                                | 457                                 | 7.14                                                             | 0.39                                                              | 6.76                                                                                  | 242585                                                                            | 0.024                                                          | 3.27                                         | 0.18                                          |
| Ferritin (1188) | SQSNLQALDAPR,<br>FANGDPTALLVIDNELR                    | 20138                                | 244                                 | 0.28                                                             | 17.25                                                             | 16.97                                                                                 | 341713                                                                            | 0.034                                                          | 0.068                                        | 4.21                                          |



|                      |                                    |       |     |       |       |       |         |         |       |        |
|----------------------|------------------------------------|-------|-----|-------|-------|-------|---------|---------|-------|--------|
| Flavodoxin<br>(1628) | DLLPGTETK,<br>VPTDGYTFAESK         | 18829 | 149 | 98.88 | 0.038 | 98.84 | 1861086 | 0.19    | 14.73 | 0.0056 |
| Ferredoxin<br>(2042) | SGAVEQPDAMGVK,<br>ADGFLLCVAFPCSDLR | 13057 | 153 | 0.73  | 0.29  | 0.44  | 5745    | 0.00057 | 0.11  | 0.044  |

\* Difference in percent is calculated as the difference in protein under high and low Fe conditions (in  $\mu\text{g}$ ) divided by the total protein (in  $\mu\text{g}$ ) multiplied by 100.

Table S3: Nutrient data from GEOTRACES cruise GT11. For samples collected via geofish, dissolved nitrate and phosphate data were selected based on the nearest sampling station to the dissolved iron sample site (less than 0.2 degrees latitude difference).

| Station number | Collection method    | latitude (degrees) | longitude (degrees) | nitrate (nM) | phosphate (nM) | dissolved Fe (nM) |
|----------------|----------------------|--------------------|---------------------|--------------|----------------|-------------------|
| 1              | Go-Flo, 30 m         | 39.700°N           | -69.808°W           | 734.1        | 69.8           | 0.51              |
| 2              | Go-Flo, 35 m         | 39.350°N           | -69.541°W           | 83           | 58.2           | 0.54              |
| 3              | Go-Flo, 28 m         | 38.690°N           | -69.060°W           | 81.6         | 16.1           | 0.43              |
| 6              | Go-Flo, 41 m         | 37.580°N           | -68.437°W           | 22.9         | 16.3           | 0.31              |
| 8              | Go-Flo, 32 m         | 35.420°N           | -66.534°W           | 43.3         | 19.6           | 0.38              |
| 10             | Go-Flo, 40 m         | 31.750°N           | -64.170°W           | 29.77        | 14.5           | 0.42              |
| 12             | Go-Flo, 41 m         | 29.700°N           | -56.810°W           | 52.3         | 9.3            | 0.62              |
| 14             | Go-Flo, 41 m         | 27.580°N           | -49.630°W           | 45.4         | 7.2            | 0.87              |
| 16             | Go-Flo, 41 m         | 26.136°N           | -44.820°W           | 30           | 7.9            | 0.8               |
| 18             | Go-Flo, 40 m         | 24.150°N           | -40.210°W           | 81.3         | 11             | 0.54              |
| 20             | Go-Flo, 41 m         | 22.333°N           | -35.870°W           | 71.9         | 8.9            | 0.48              |
| 22             | Go-Flo, 51 m         | 19.433°N           | -29.380°W           | 27.1         | 9.9            | 0.35              |
| 24             | Go-Flo, 40 m         | 17.400°N           | -24.500°W           | 209.3        | 21.6           | 0.39              |
| 1              | Geofish, mixed layer | 39.693°N           | -69.808°W           | 734.1        | 69.8           | 0.65              |
| 2              | Geofish, mixed layer | 39.350°N           | -69.541°W           | 83.0         | 58.2           | 0.75              |
| 8              | Geofish, mixed layer | 35.420°N           | -66.534°W           | 43.3         | 19.6           | 1.18              |
| 10             | Geofish, mixed layer | 31.750°N           | -64.17°W            | 29.8         | 14.5           | 0.45              |
| 12             | Geofish, mixed layer | 29.700°N           | -56.817°W           | 52.3         | 9.3            | 0.62              |
| 14-15          | Geofish, mixed layer | 27.583°N           | -49.693°W           | 59.1         | 6.7            | 0.89              |
| 16-17          | Geofish, mixed layer | 26.137°N           | -44.826°W           | 45.2         | 9.5            | 0.74              |
| 18-19          | Geofish, mixed layer | 24.150°N           | -40.218°W           | 34.3         | 10.3           | 0.48              |
| 22-23          | Geofish, mixed layer | 19.433°N           | -29.383°W           | 45.5         | 13.6           | 0.32              |
| 23-24          | Geofish, mixed layer | 17.400°N           | -24.500°W           | 47.9         | 18.5           | 0.32              |

Table S4: Parallel reaction monitoring conditions for targeted natural abundance peptides and isotopically labeled peptide standards.

| Protein              | Peptide standard target sequences | Natural abundance mass (m/z) | Isotopically-labeled standard mass (m/z) |
|----------------------|-----------------------------------|------------------------------|------------------------------------------|
| IdiA<br>(1196)       | ADVIIIVDAAR,                      | 578.3402                     | 583.3444                                 |
|                      | LVEASGISLVQR,                     | 636.3695                     | 641.3737                                 |
|                      | GLTSNVSQPYFGDIGLIR                | 997.5207                     | 1002.525                                 |
| Ferritin<br>(1188)   | SQSNLQALDAPR,                     | 707.8497                     | 712.8538                                 |
|                      | FANGDPTALLVIDNELR                 | 929.4889                     | 934.493                                  |
| Flavodoxin<br>(1628) | DLLPGTETK,                        | 487.2637                     | 491.2708                                 |
|                      | VPTDGYTFAESK                      | 657.8143                     | 661.8213                                 |
| Ferredoxin<br>(2042) | SGAVEQPDAMGVK,                    | 644.8137                     | 648.8208                                 |
|                      | ADGFTLLCVAFPCSDLR                 | 971.4635                     | 976.4676                                 |

Table S5: global proteome data (see excel spreadsheet uploaded separately).
